# Neural Representations of Food-Related Attributes in the Human Orbitofrontal Cortex in Health and Disease

**Abbreviated Title:** Taste & Health Information in Orbitofrontal Cortex

## Authors

Alice M. Xue<sup>1,2</sup>, Karin Foerde<sup>3,4</sup>, B. Timothy Walsh<sup>3,4</sup>, Joanna E. Steinglass<sup>3,4</sup>, Daphna Shohamy<sup>1,2,5</sup>, and Akram Bakkour<sup>1,2,¶</sup>

## Affiliations

<sup>1</sup>Mortimer B. Zuckerman Mind, Brain, Behavior Institute, Columbia University, New York, NY, USA 10027

<sup>2</sup>Department of Psychology, Columbia University, New York, NY, USA 10027

<sup>3</sup>Department of Psychiatry, Columbia University Irving Medical Center, New York, NY, USA 10032

<sup>4</sup>New York State Psychiatric Institute, New York, New York, NY, USA 10032

<sup>5</sup>The Kavli Institute for Brain Science, Columbia University, New York, NY, USA 10027

<sup>¶</sup>Current address: Department of Psychology, University of Chicago, Chicago, IL, USA 60637

**Correspondence to:** [alice.xue@columbia.edu](mailto:alice.xue@columbia.edu) (AMX) and [bakkour@uchicago.edu](mailto:bakkour@uchicago.edu) (AB)

**Conflict of interest statement:** Dr. Steinglass reports receiving royalties from UpToDate. Dr. Walsh reports receiving royalties or honoraria from Guilford Publications, McGraw-Hill, the Oxford University Press, the British Medical Journal, the Johns Hopkins Press, and Guidepoint Global.

**Acknowledgements:** This work was funded in part by the Global Foundation for Eating Disorders, the US National Institute for Mental Health (R01 MH079397, K23 MH076195, K24 MH113737), the National Science Foundation (grant 1606916), the McKnight Foundation, and the Klarman Family Foundation.

## **Abstract**

Decisions about what to eat recruit the orbitofrontal cortex (OFC) and involve the evaluation of food-related attributes, such as taste and health. These attributes are utilized differently by healthy individuals and patients with disordered eating behavior, but it is unclear whether these attributes are decodable from activity in the OFC in both groups and whether neural representations of these attributes are differentially related to decisions about food. We used fMRI combined with behavioral tasks to investigate the representation of taste and health in the human OFC and the role of these representations in food choices in healthy individuals and patients with anorexia nervosa (AN). We found that subjective ratings of taste and health could be decoded from patterns of activity in the OFC in both groups. However, health-related patterns of activity in the OFC were more related to food choices and the magnitude of preferences among patients with AN than healthy individuals. These findings suggest that maladaptive decision-making in AN is associated with more consideration of health information represented by the OFC during deliberation about what to eat.

## **Significance Statement**

An open question about the orbitofrontal cortex (OFC) is whether it supports the evaluation of food-related attributes during deliberation about what to eat. We found that health and taste information were decodable from patterns of neural activity in the OFC in both patients with anorexia nervosa (AN) and healthy controls. Critically, neural representations of health were more strongly related to choices in patients with AN, suggesting that maladaptive over-consideration of healthiness during deliberation about what to eat is related to activity in the OFC. More broadly, these results show that activity in the human OFC is associated with the evaluation of relevant attributes during value-based decision-making. These findings may also guide future research into the development of treatments for AN.

## 1. Introduction

Deciding what to eat involves the evaluation of multiple types of information and consideration of subsequent consequences and outcomes. Previous studies have shown that the orbitofrontal cortex (OFC) plays a central role in representing the subjective value of individual foods and food choice (Padoa-Schioppa and Assad, 2006; Plassmann et al., 2007; Clithero and Rangel, 2014; Suzuki et al., 2017; Ballesta et al., 2020). Other studies have demonstrated that evaluations of taste and health—two food attributes that tend to be unrelated among healthy individuals—interact to determine food choices (Hare et al., 2009, 2011; Maier et al., 2015; Lloyd et al., 2020).

The OFC has been further implicated in the integration of basic food-related attributes during the computation of the subjective value placed on foods (Suzuki et al., 2017), and it is often assumed that these computations also take place during decision-making. But how are these attributes represented at the neural level and how do they contribute to deliberation about what to eat? One approach to addressing these open questions is to compare neural activity and choices in populations that differ in the extent to which they rely on taste versus health when making food-related decisions. Individuals with anorexia nervosa (AN) are well-known to adhere to a low-fat, low-calorie diet even to the point of starvation (Arcelus et al., 2011; Walsh, 2011). Given this well-characterized behavioral profile, examination of the neural representations of taste and health and their link to behavior in AN may offer new insights into the mechanisms that perpetuate this devastating illness. This approach can also facilitate understanding of how food attributes are represented and related to choices, more generally. In the current study, we use multivariate analysis methods to better understand the representations of taste and health information in the OFC and how these representations contribute to food choice. Here, we use

“taste” to denote subjective ratings of how tasty different foods are and “health” to denote subjective ratings of how healthy different foods are.

Taste and health evaluations play different roles during food choices among individuals with AN as compared to healthy individuals (Foerde et al., 2015, 2018, 2020; Steinglass et al., 2015, 2016; Uniacke et al., 2020). In an fMRI study, overall levels of activity in univariate analyses of taste and health ratings were differentially associated with choices across individuals, with choice-related ventromedial prefrontal cortex (vmPFC) activity correlated with taste-related activity among healthy controls (HC) and health-related activity among patients with AN (Foerde et al., 2015, supplementary Fig. 5). These findings hint at the possibility that neural representations of taste and health information differentially guide choices in individuals with AN and healthy individuals. Multivariate pattern analysis—which has greater sensitivity than univariate analyses in the detection of mental representations (Norman et al., 2006)—may provide deeper insights into differences between patients with AN and healthy controls (Frank et al., 2016).

We conducted secondary analyses of neuroimaging data from Foerde et al. 2015 using multivariate pattern analyses. In Foerde et al. 2015, participants rated the tastiness and healthiness of a range of different foods and made food choices during fMRI scanning. The goal of the secondary analysis was to more directly test whether taste and health are represented in patterns of brain activity within the OFC. Furthermore, the behavioral relevance of such activity was tested by linking it to individuals’ choices. To do so, we first assessed whether taste and health information could be decoded using multivariate pattern analyses in the OFC during taste and health ratings in both HC and AN (within-task classification). Next, we applied this decoding of taste and health to a subsequent choice phase (cross-task classification) in order to test

whether evidence of taste- and health-related representations during choices was related to the actual choices made.

## **2. Methods**

### **2.1. Participants**

Twenty-one hospitalized women with AN and 21 healthy control women (HC) completed this study. In the analyses described below, all HC participants were included. One individual with AN was missing a structural image and excluded from analyses because functional registration could not be performed. This resulted in a final sample of 41 participants.

Participants were right-handed, between the ages of 16 and 39 years old, taking no psychotropic medications, not pregnant, with no history of significant neurological illness, and no contraindication to MRI. HC were normal weight women (BMI between 18 kg/m<sup>2</sup> and 25 kg/m<sup>2</sup>) and were excluded from participation if they were taking psychotropic medications, had any history of psychiatric illness, or were currently dieting. All participants provided written informed consent and the New York State Psychiatric Institute Institutional Review Board approved the study.

Eating disorder diagnoses were made via the Eating Disorder Examination (EDE) (Fairburn and Terence Wilson, 1993) and co-occurring diagnoses were assessed via the Structured Clinical Interview (SCID) for Diagnostic and Statistical Manual of Mental Disorders, 4th Edition (DSM-IV) (Spitzer et al., 1987). Ten patients met the DSM-5 (American Psychiatric Association, 2013) criteria for the restricting subtype of AN and 11 patients met the criteria for the binge-eating/purging subtype of AN. For participants with AN, study procedures occurred the day after

hospital admission. Treatment at NYSPI is provided at no cost for those interested in and eligible for participation. HC received \$125 as compensation for their time.

## **2.2. Behavioral Task Procedures**

Pre-scan intake was standardized and controlled, as follows: at 12pm, participants were served a research lunch consisting of ~550 kcal (turkey sandwich, Nutrigrain bar, 8 ounces of water). In between lunch and scanning at 2pm, participants were instructed not to eat or drink anything with the exception of water.

Participants completed three tasks in the scanner: taste rating, health rating, and food choice. The order of the taste and health rating tasks was counterbalanced and randomized across participants. Food choices always followed the two rating tasks. The details of the behavioral task procedures are described in detail in Foerde et al., 2015.

### **2.2.1. Stimuli**

Seventy-six food items were presented in each task (**Fig. 1**). Half of the food items were low fat (<30% of total calories from fat, as determined by our staff research nutritionist) and half of the food items were high fat. In each task, the food items were presented on white plates against a black background in high-resolution color photographs. These stimuli are included in the Food Folio by Columbia Center for Eating Disorders stimulus set (Lloyd and Foerde, 2020; Lloyd et al., 2020; Schebendach et al., 2020). The order of stimulus presentation was randomized in each task. A rating scale was shown below the food item on each trial.



### **2.2.2. Taste Rating**

In the taste rating task (**Fig. 1a**), participants were asked to rate the tastiness of 76 food items on a five-point Likert scale from “bad” to “neutral” to “good.” The direction of the rating scale was counterbalanced and randomized across participants. They were instructed to rate the food items only on taste.

### **2.2.3. Health Rating**

In the health rating task (**Fig. 1b**), participants were asked to rate the healthiness of 76 food items on a five-point Likert scale from “unhealthy” to “neutral” to “healthy.” The direction of the rating scale was counterbalanced and randomized across participants.

### **2.2.4. Food Choice**

The food choice task was completed after the taste and health rating tasks (**Fig. 1c**). For each participant, a reference food item that had been rated by that participant as neutral in taste and health in the rating tasks was selected at random by a computer program. If no food items were rated as being neutral in taste and health, an item that was neutral on health and positive on taste was selected to minimize biasing choices based on taste value. For 20 HC and 18 AN, the reference item was rated by participants as neutral in taste and health. For 1 HC and 1 AN, the reference item was neutral on health and rated 1 step toward “good” on taste. For 1 AN, the reference item was neutral on health and rated 1 step toward “bad” on taste.

During the food choice task, participants were presented the reference food and a trial-unique food on 76 trials. The reference food was always presented on the left side of the screen and was the same on every trial. The trial-unique food was always presented on the right.

Participants were instructed to choose the food they would like to eat and indicated their preference on each trial using a Likert scale with “strongly prefer” anchoring each end of the

scale. The side-by-side presentation of the foods ensured that participants were aware their choices were relative to the reference food.

To incentivize participants to make choices according to their preferences, participants were told that they would receive a snack-sized portion of one of their chosen foods, selected at random, after the task. Participants were served a snack-sized portion of one of their chosen foods at 3 p.m., observed by staff.

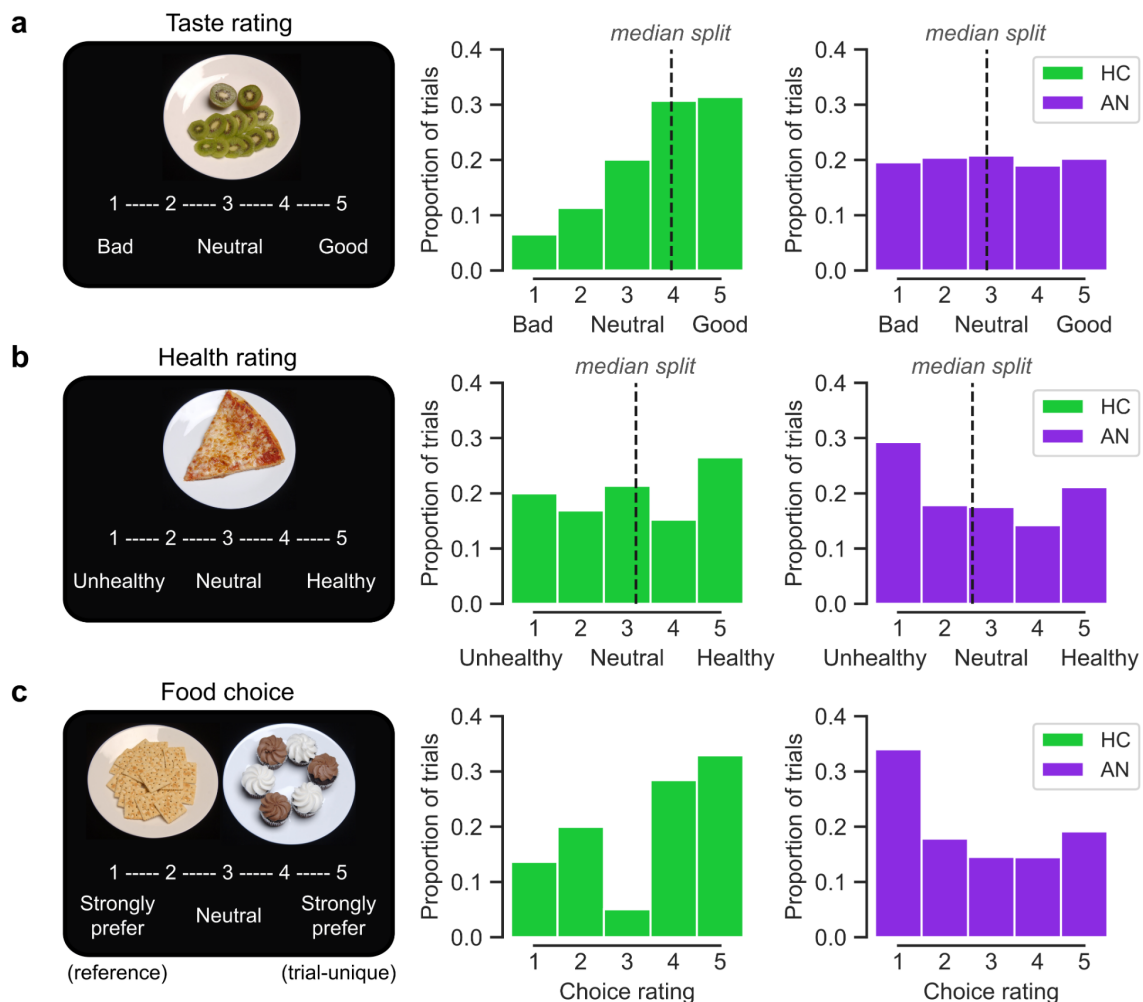

**Figure 1. Task design and behavioral results.** During taste and health ratings (a and b), participants viewed and rated 76 foods on a Likert scale from 1 to 5. The order of the taste and health rating tasks was counterbalanced across participants. (a) Taste rating distributions are

*shown for all HC participants in green and all AN participants in purple. Median splits were performed on taste ratings for each participant. The dashed black lines indicate the group-level median across each group of participants (HC=3.95±0.59, AN=2.90±0.83). For the purposes of multivariate pattern analysis, each food was assigned a “low” or “high” taste label according to participant-specific median splits. (b) Health rating distributions are shown for all HC participants in green and all AN participants in purple. Median splits were performed on health ratings for each participant. The dashed black lines indicate the group-level median across each group of participants (HC=3.19±0.60, AN=2.60±0.66). Each food was assigned a “low” or “high” health label according to participant-specific median splits. (c) The rating tasks were followed by a food choice task in which participants were asked to choose between a reference food on the left (rated neutral in taste and health) and a trial-unique food on the right. The reference food was the same on every trial. Participants rated their choice preference on a Likert scale from 1 to 5. The distribution of choice ratings is shown on the right for HC (in green) and AN (in purple).*

### **2.3. fMRI Acquisition**

Neuroimaging was conducted at Columbia University’s Program for Imaging and Cognitive Sciences on a 3.0T Phillips MRI system with a SENSE head coil. Functional data were acquired using a gradient echo T2\*-weighted echoplanar (EPI) sequence with blood oxygenation level-dependent (BOLD) contrast (TR=2,000ms, TE=19ms, flip angle=77°, 3×3×3mm voxel size; 46 contiguous axial slices). To allow for magnetic field equilibration during each functional scanning run, four volumes were discarded before the first trial. Structural images were acquired using a high-resolution T1-weighted magnetization prepared rapid gradient echo (MPRAGE) pulse sequence.

### **2.4. Imaging Data Preprocessing**

Preprocessing of the raw fMRI data was performed using fMRIPrep 1.4.0 (Esteban et al., 2018a, 2018b), which is based on Nipype 1.2.0 (Gorgolewski et al., 2011).

#### **2.4.1. Anatomical Data Preprocessing**

The T1-weighted (T1w) image was corrected for intensity non-uniformity (INU) with N4BiasFieldCorrection (Tustison et al., 2010), distributed with ANTs 2.2.0 (Avants et al., 2008), and used as T1w-reference throughout the workflow. The T1w-reference was then skull-stripped

with a Nipype implementation of the antsBrainExtraction.sh workflow (from ANTs), using OASIS30ANTs as target template. Volume-based spatial normalization to one standard space (MNI152NLin2009cAsym) was performed through nonlinear registration with antsRegistration (ANTs 2.2.0), using brain-extracted versions of both T1w reference and the T1w template. The following template was selected for spatial normalization: ICBM 152 Nonlinear Asymmetrical template version 2009c (Fonov et al., 2009).

#### **2.4.2. Functional Data Preprocessing**

For each of the 3 BOLD runs per subject (across all tasks), the following preprocessing was performed. First, a reference volume and its skull-stripped version were generated using a custom methodology of fMRIPrep. The BOLD reference was then co-registered to the T1w reference using bbregister (FreeSurfer) which implements boundary-based registration (Greve and Fischl, 2009). Co-registration was configured with nine degrees of freedom to account for distortions remaining in the BOLD reference. Head-motion parameters with respect to the BOLD reference (transformation matrices, and six corresponding rotation and translation parameters) are estimated before any spatiotemporal filtering using mcflirt (FSL 5.0.9, Jenkinson et al., 2002). The BOLD time-series (including slice-timing correction when applied) were resampled onto their original, native space by applying a single, composite transform to correct for head-motion and susceptibility distortions. These resampled BOLD time-series will be referred to as preprocessed BOLD in original space, or just preprocessed BOLD. The BOLD time-series were resampled into standard space, generating a preprocessed BOLD run in 'MNI152NLin2009cAsym' space. First, a reference volume and its skull-stripped version were generated using a custom methodology of fMRIPrep. Several confounding time-series were calculated based on the preprocessed BOLD: framewise displacement (FD), DVARS and three region-wise global signals. FD and DVARS are calculated for each functional run, both using their implementations in Nipype (following the definitions by Power et al., 2014). The head-

motion estimates calculated in the correction step were also placed within the corresponding confounds file. All resamplings can be performed with a single interpolation step by composing all the pertinent transformations (i.e. head-motion transform matrices, susceptibility distortion correction when available, and co-registrations to anatomical and output spaces). Gridded (volumetric) resamplings were performed using `antsApplyTransforms` (ANTs), configured with Lanczos interpolation to minimize the smoothing effects of other kernels (Lanczos, 1964). Many internal operations of fMRIPrep use Nilearn 0.5.2 (Abraham et al., 2014), mostly within the functional processing workflow. For more details of the pipeline, see [the section corresponding to workflows in fMRIPrep's documentation](#).

## **2.5. ROI Definitions**

We anatomically determined regions of interest (ROIs) using the Automated Anatomical Labeling (AAL) Atlas for SPM12 and transformed them from MNI 6th generation space to MNI152NLin2009cAsym space (Tzourio-Mazoyer et al., 2002; Rolls et al., 2015). The lateral orbitofrontal cortex (IOFC) ROI was created by combining the orbital parts of the left and right middle frontal gyrus, superior frontal gyrus, and inferior frontal gyrus (Suzuki et al., 2017). The medial orbitofrontal cortex (mOFC) ROI was created by combining the medial orbital part of the left and right superior frontal gyrus (Suzuki et al., 2017). The orbitofrontal cortex (OFC) ROI was created by combining the IOFC and mOFC ROIs. The V1 ROI was created by combining the left and right calcarine cortex, as defined by the AAL Atlas.

## **2.6. Imaging Data Analysis**

The classification analyses of interest required several steps. 1) Standard univariate GLM analyses were run to generate the patterns of activity on each trial of each task. 2) Behavioral labels were assigned for every trial and used for classification. 3) Multivariate pattern analysis (MVPA) was used to train a classifier by providing it with patterns of activity in regions of interest

along with their labels. 4) The trained classifier was fed a new pattern of activity it had not been trained on to predict the label that ought to be assigned to the pattern. 5) The predicted label was verified as a match with the actual label or not. 6) Steps 3 to 5 were repeated multiple times to determine the classifier's accuracy. 7) Finally, statistical significance of classification accuracy was determined using non-parametric permutation tests.

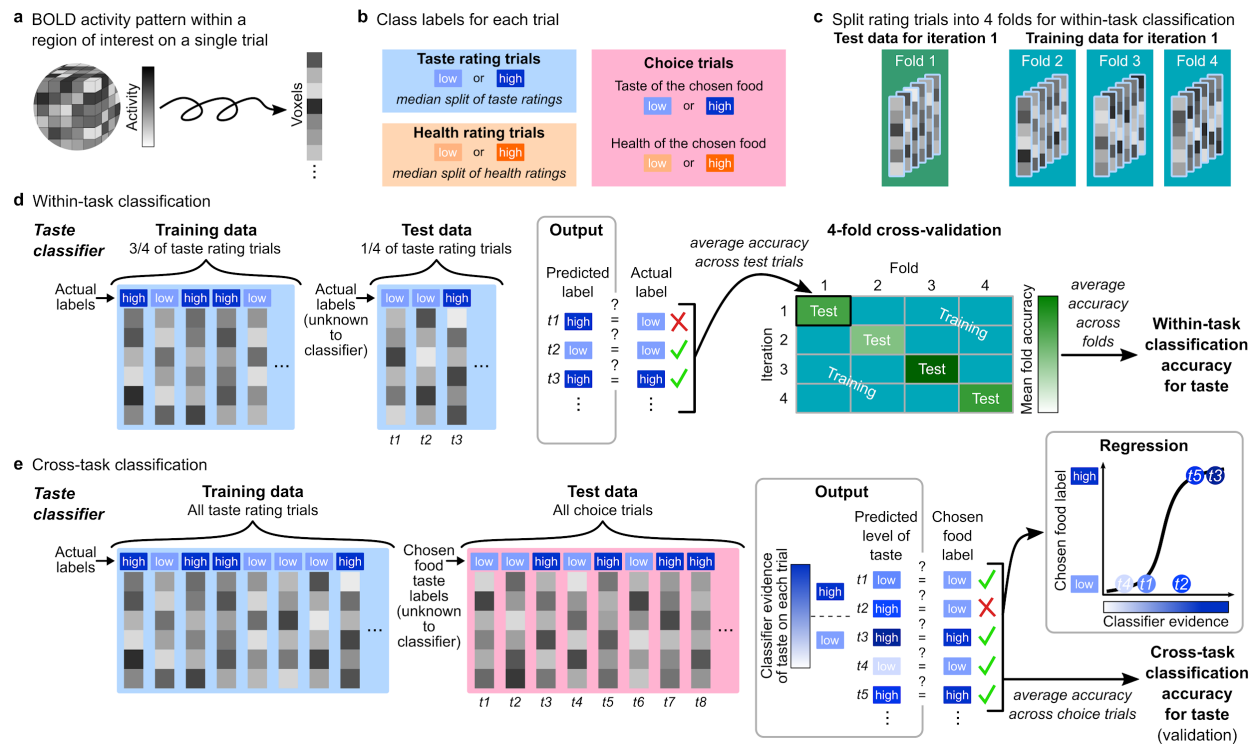

**Figure 2. Multivariate pattern analysis approach.** (a) Univariate analyses were conducted to extract BOLD activity patterns from ROIs from each trial of each task. 3D activity patterns were transformed into vectors of voxel activity, which constituted the features used in subsequent classification analyses. (b) Each trial was assigned a class label. Median splits on taste and health ratings were conducted for each participant and used to assign each rating trial to a high taste/health class or a low taste/health class. Two labels were assigned to each choice trial: one for the high/low tastiness of the chosen food and another for the high/low healthiness of the chosen food. (c) For within-task classification of taste, the taste rating trials were split into four partitions. One fold was left out for classifier testing (green) and three folds were used for classifier training (teal). A different fold was used for testing during each iteration of the cross-validation procedure. The same steps were taken for health rating trials. (d) For within-task classification of taste, classifiers were trained on labeled activity patterns from three folds and tested on activity patterns from the left-out set of trials. The taste classifiers' predicted high/low taste label for each test trial was compared to actual test trial labels. Classification accuracy for the test fold was defined as mean accuracy across test trials in the corresponding fold. This procedure was repeated three times with a different test fold on each iteration. Taste

*classification accuracy was defined as mean classification accuracy across test folds. Separate taste classifiers were trained and tested for each participant and classification accuracy was averaged across participants in the HC and AN groups (Fig. 3a). The same procedure was performed for within-task classification of health, except health rating trials and labels were used instead of taste rating trials and labels (Fig. 3b). (e) The taste classifiers for cross-task classification of taste were trained on labeled activity patterns from all taste rating trials and tested on activity patterns from all choice trials. These classifiers predicted the level of taste evidence in each choice trial's activity pattern. A logistic regression model (rightmost box titled "Regression") was run to test the relationship between taste classifier evidence and the high/low tastiness of the chosen food (Fig. 4a; Table 1). To validate this cross-task classification approach, the continuous measure of taste classifier evidence (x-axis in Fig. 4a) was converted to a binary score and compared to the high/low taste label of the chosen food. Cross-task accuracy was defined as mean accuracy in predicting the taste label of the chosen food. Separate taste classifiers were trained and tested for each participant. Mean cross-task accuracies for taste across participants in the HC and AN groups are reported in Fig. 4c. The same procedures were performed for cross-task classification of health, except health rating trials and labels were used instead of taste rating trials and labels (Fig. 4b and 4d).*

### **2.6.1. Univariate Data Analysis to Generate Input for MVPA**

We first conducted separate general linear model (GLM) analyses on the preprocessed imaging data for each task to generate input for the multivariate analyses described below. All models were estimated using FSL's FEAT (Woolrich et al., 2001).

#### **2.6.1.1. GLM Taste**

GLM Taste for the taste rating task included three regressors of interest: (i) onsets for valid trials (where participants responded before the response window ended), (ii) onsets for timing of the button presses (valid trial onsets + reaction times), and (iii) onsets for missed trials (where participants did not respond within the response window). On average, HC had  $75.2 \pm 1.2$  valid taste rating trials and AN had  $74.0 \pm 4.2$  valid taste rating trials (out of 76 total). The two groups had a similar number of valid taste trials ( $t(39)=1.35$ ,  $p=0.184$ ).

#### **2.6.1.2. GLM Health**

GLM Health for the health rating task included three regressors of interest: (i) onsets for valid trials (where participants responded before the response window ended), (ii) onsets for timing of the button presses (valid trial onsets + reaction times), and (iii) onsets for missed trials (where

participants did not respond within the response window). On average, HC had  $75.6 \pm 0.6$  valid health rating trials and AN had  $74.4 \pm 2.0$  valid health rating trials (out of 76 total). The number of valid health trials differed significantly between groups ( $t(39)=2.60$ ,  $p=0.013$ ).

### **2.6.1.3. GLM Choice**

GLM Choice for the food choice task included three regressors of interest: (i) onsets for valid trials (where participants responded before the response window ended), (ii) onsets for timing of the button presses (valid trials onset + reaction times), and (iii) onsets for missed trials (where participants did not respond within the response window). There were on average  $75.4 \pm 1.2$  valid food choice trials for HC and  $74.3 \pm 1.9$  valid food choice trials for AN (out of 76 total). The number of valid food choice trials differed between groups ( $t(39)=2.35$ ,  $p=0.024$ ).

### **2.6.1.4. GLM Regressors**

For all three GLMs, regressor (i) was modeled with a boxcar with a duration equal to the trial duration (reaction time), regressor (ii) was modeled with a delta function, and regressor (iii) was modeled with a fixed boxcar with a duration equal to that of the response window (4 seconds). Confound regressors included the six x, y, and z translation and rotation parameters. As noted in Foerde et al., 2015, quality control analyses indicated that discarding four volumes was insufficient to allow for magnetic field equilibration, so we also included a confound regressor to remove the effects of the first volume by adding a regressor with a 1 for the first volume and 0s elsewhere. No spatial smoothing was applied. All regressors were entered into the first level analysis and all (but the added confound regressors) were convolved with a canonical double-gamma hemodynamic response function. The models were estimated separately for each participant. The parameter estimates from the contrast for valid trials (contrast [1 0 0]) were used for subsequent multivariate analyses (**Fig. 2a**).



## **2.6.2. Multivariate Data Analysis: Within-Task Classification**

### **2.6.2.1. Taste Classification**

Decoding analyses were conducted to examine whether taste information was represented in fMRI response patterns in the IOFC and mOFC. A two-class support vector machine (SVM) classifier was trained separately for each participant on patterns of neural activity during taste ratings. This analysis was conducted using PyMVPA with the trade-off parameter (between margin width and number of support vectors)  $C = 1$  (Hanke et al., 2009).

#### **2.6.2.1.1. Definition of Features**

The neural activity patterns used as classification samples were raw parameter estimates for the effect of valid rating trials on BOLD (regressor (i) from GLM Taste described above). The raw parameter estimate values from voxels within each region of interest (see ROI Definitions above) were the features used to train taste classifiers for each participant (**Fig. 2a and 2d**).

#### **2.6.2.1.2. Definition of Classes**

To maximize the number of trials that could be used during training and ensure a balanced number of classification samples in each class, a median split was performed on the taste ratings (**Fig. 2b**). The median taste rating was calculated separately for each participant. Median taste ratings were on average  $3.95 \pm 0.59$  for HC and  $2.90 \pm 0.83$  for AN (**Fig. 1a**). The group-level medians differed significantly between groups ( $t(39) = 4.71, p < 0.0001$ ). Foods rated below the participant's median rating were assigned to the "low" taste class. Foods rated above the participant's median rating were assigned to the "high" taste class. Foods with the median rating value were assigned to the "low" or "high" taste class depending on which assignment minimized the difference in the number of trials between classes. For HC, taste ratings were skewed toward the "good" tasting end of the rating scale, raising concerns that the

definitions of high/low taste classes may not have been suitable for participants with skewed taste rating distributions (**Fig. 1a**). For ten out of 21 HC individuals, the “high” taste class only consisted of foods that had the maximum rating of five. For these individuals, classifiers were trained to distinguish “good” tasting foods from “somewhat good,” “neutral,” “somewhat bad,” and “bad” tasting foods. Although “somewhat good” tasting items were placed in the low taste class, cross-validation accuracies were not poorer for HC participants with a median taste rating of five. Instead, a permutation test showed that across ROIs (IOFC and mOFC), cross-validation accuracies for these participants outperformed cross-validation accuracies for participants with lower median taste ratings ( $p=0.001$ ). Despite many skewed taste rating distributions among HC participants, defining high/low taste classes using a median split produced separable neural activity patterns.

#### ***2.6.2.1.3. Cross-Validation Procedure***

Classifier training and testing were performed using a four-fold cross-validation procedure (**Fig. 2c**). On each fold, the classifiers were trained on three-fourths of taste rating trials. To determine whether the patterns of activity input to the classifiers contained information about taste, we tested whether the trained classifiers could accurately classify each left-out activity pattern from the remaining one-fourth of trials as being high/low in taste. The samples of data used in the left-out partition on each fold were unique and randomly selected. Mean accuracy scores across folds were calculated for each participant and then averaged across participants.

#### ***2.6.2.1.4. Determining Statistical Significance***

To determine whether taste information was represented in the IOFC and mOFC, the statistical significance of the cross-validation accuracies was tested using permutation tests: the class labels of the trials in the training set were shuffled, four-fold cross-validation was performed, and

cross-validation scores were averaged across participants. This procedure was repeated 1000 times to generate a null distribution of mean cross-validation accuracies. For all permutation tests, p-values were the proportion of permuted cross-validation accuracies in the null-distribution greater than the cross-validation accuracies of interest. Mean cross-validation accuracies were considered significant if they were greater than the 95th percentile of the null distribution.

The statistical significance of differences in cross-validation accuracies between groups (HC and AN) and ROIs (IOFC and mOFC) was also tested using permutation tests. A null distribution for group differences was generated by computing group differences 1000 times after shuffling the group labels of cross-validation scores calculated for each participant. The null distribution for ROI differences was generated similarly, but with shuffled region labels instead of shuffled group labels. P-values were calculated as described above.

### **2.6.2.2. Health Classification**

To test whether health information could be decoded from fMRI response patterns in the IOFC and mOFC, the procedures described for taste classification were followed. Any differences in procedure are detailed below.

#### **2.6.2.2.1. Definition of Features**

The procedure used to extract neural activity patterns for health classification was identical to the procedure for taste classification, except that raw parameter estimates for the effect of valid rating trials on BOLD were from regressor (i) from GLM Health (**Fig. 2a**).

#### **2.6.2.2.2. Definition of Classes**

Median health ratings were calculated separately for each participant (group-level median health ratings: HC=3.19±0.60, AN=2.60±0.66, **Fig. 1b**). The group-level medians differed significantly between groups ( $t(39)=3.05$ ,  $p=0.004$ ). Foods rated below the participant's median rating were assigned to the "low" health class. Foods rated above the participant's median rating were assigned to the "high" health class. Foods with the median rating value were assigned to the "low" or "high" health class depending on which assignment minimized the difference in the number of trials between classes. The suitability of the "low" and "high" class assignments was not assessed here because the health ratings, unlike the taste ratings, were fairly evenly distributed in both groups (**Fig. 1b**).

### **2.6.2.3. Luminance Classification**

Control analyses based on decoding of objective visual information were undertaken to evaluate the classification approach (Suzuki et al., 2017). The analysis steps were identical to those performed for taste and health within-task classification, except for the ROI used. Any deviations in procedures are noted below.

#### **2.6.2.3.1. Definition of Features**

The procedure for extracting features were identical to those used for taste and health classification, except these features were extracted from V1.

#### **2.6.2.2.2. Definition of Classes**

The luminance of each food image was determined by extracting the mean red, blue, and green intensities across pixels and computing a weighted sum ( $0.2126*\text{red} + 0.7152*\text{green} + 0.0722*\text{blue}$ ) (Suzuki et al., 2017). Each image was assigned to a "high" luminance or "low" luminance class based on a median split. This analysis was conducted separately for neural activity during the taste and health ratings.

### **2.6.2.2.3. Cross-Validation Procedure**

The cross-validation procedure for taste and health classification was also performed for luminance decoding from patterns of neural activity during the taste and health ratings. Cross-validation accuracy scores were averaged across rating types.

### **2.6.2.2.4. Determining Statistical Significance**

Permutation tests as described for the taste and health classification analyses were also conducted to assess statistical significance. The null distributions computed for luminance decoding from the taste and health rating activity patterns were averaged across rating types for each iteration of the permutation test, yielding 1000 permuted cross-validation accuracies for luminance decoding from V1. The 95th percentile was calculated from the resulting null distribution and p-values were calculated as described above.

### **2.6.2.4. Exploratory Searchlight Analyses**

To examine whether brain regions other than the IOFC and the mOFC contain information about taste and health, we conducted exploratory searchlight analyses. The searchlight analyses were conducted with a searchlight diameter of 5 voxels (i.e. 15mm) and four-fold cross-validation using PyMVPA (Hanke et al., 2009). The resulting searchlight maps were spatially smoothed with a 6mm full width at half maximum (FWHM) Gaussian kernel. To assess the statistical significance of the searchlight maps and to compare the searchlight maps for HC and AN, we used a non-parametric two-sample unpaired t-test against zero and corrected for multiple comparisons using threshold-free cluster enhancement (TFCE) with 5000 permutations. These statistical tests were performed using FSL's randomise (Winkler et al., 2014).

### **2.6.3. Multivariate Data Analysis: Cross-Task Classification of Taste and Health**

#### ***During the Choice Phase***

##### **2.6.3.1. Cross-Task Classification**

Once it was determined that taste and health information could be decoded from neural activity patterns in the IOFC and the mOFC, we examined whether neural representations of taste and health information were evident in fMRI responses during the choice phase. This classification analysis was conducted using scikit-learn with the regularization parameter  $C = 1$  (Pedregosa et al., 2011).

###### **2.6.3.1.1. Definition of Features**

There were no differences between the IOFC and mOFC in the results of the taste and health decoding analyses and subsequent analyses involving the choice task were conducted on the combined OFC ROI (**Fig. 3a and 3b**). Separate taste and health classifiers were trained on all valid taste and health trials for each participant and the classifiers were tested on raw parameter estimates for the effect of valid choice trials on BOLD (regressor (i) from GLM Choice described above; **Fig. 2e**).

###### **2.6.3.1.2. Cross-Task Classification Output**

For each choice task trial, the classifiers output a classifier evidence score between 0 and 1, where a score less than 0.5 indicated evidence of low taste/health and a score greater than 0.5 indicated evidence of high taste/health (**Fig. 2e**). The classifier evidence scores were obtained from the `predict_proba` function from scikit-learn (Pedregosa et al., 2011).

###### **2.6.3.1.3. Predicting Choices from Taste and Health Brain Patterns**

To examine whether classifier evidence of taste/health information was related to participants' choices, we ran a mixed-effects logistic regression model using the lme4 package in R (Bates et al., 2015). For taste and health separately, we tested the interaction between classifier evidence scores (continuous) and participant group (HC was coded as 0 and AN was coded as 1) on choices (coded as 0 if chosen item had a low taste/health label and 1 if chosen item had a high taste/health label). As described above, whether the chosen item was high/low in taste/health was determined based on a median split for each participant. The models included a random intercept and random slope for each participant.

#### ***2.6.3.1.4. Definition of Classes for Cross-Task Accuracy***

During the choice task two food images were presented simultaneously (**Fig. 1c**), leaving ambiguity about how the images were represented in the neural response. In the choice models relating classifier evidence to behavior, we assumed that the chosen item was more saliently represented than the unchosen item in the neural response and labeled the choice trials with the high/low taste/health of the chosen items (**Fig. 2e**). The alternative possibility, that the trial-specific item (i.e., item on the right) was more saliently represented than the reference item (i.e., item on the left, which was the same on every trial) during each choice trial, was also tested. Here, the choice trials were labeled with the high/low taste/health of the trial-specific items.

After removing choice trials with a neutral choice rating, on which neither the reference nor the trial-specific item was selected, and trials where the taste rating of the trial-specific item was not provided, there were  $69.9 \pm 4.9$  choice trials for HC and  $60.8 \pm 8.1$  choice trials for AN ( $t(39) = 4.39$ ,  $p < 0.0001$ ). The number of choice trials with health ratings for the trial-specific items and non-neutral choice ratings was  $70.3 \pm 4.7$  for HC and  $61.4 \pm 8.6$  for AN ( $t(39) = 4.15$ ,  $p < 0.0002$ ).

### **2.6.3.1.5. Cross-Task Accuracy Calculation**

Classifier evidence scores were converted to binary predictions (scores of less than 0.5 to 0; scores of greater than or equal to 0.5 to 1; **Fig. 2e**) and compared with the high/low taste/health label of the chosen item, as determined by a median split (**Fig. 2b**). To examine whether mean cross-task classification accuracy across participants for each group was significantly above chance performance (50%), we used one-tailed one-sample t-tests. Cross-task accuracies calculated using the ratings of the chosen items and trial-specific items were compared in a mixed-effects linear regression model in R (Bates et al., 2015).

### **2.6.3.1.6. Classifier Evidence and Choice Preferences**

To examine whether classifier evidence was related to choice preferences, we used mixed-effects linear regression models. In the taste model, we tested the three-way interaction between taste classifier evidence scores (continuous), participant group (HC was coded as 0 and AN was coded as 1), and the tastiness of the trial-unique item (tasty: previous rating of at least 4 on taste; not tasty: previous rating of less than 4 on taste) on choice ratings (1 to 5, with 1 indicating a strong preference for the reference item on the left, 3 indicating no preference, and 5 indicating a strong preference for the trial-unique item on the right). In the health model, we similarly tested the interaction between health classifier evidence scores, participant group, and the healthiness of the trial-unique item (healthy: previous rating of at least 4 on health; not healthy: previous rating of less than 4 on health) on choice ratings. The models included a random intercept and random slope for each participant.

## **2.7. Code Accessibility**

Analysis code and outputs are available at [https://github.com/alicexue/FCT\\_MVPA](https://github.com/alicexue/FCT_MVPA).



### 3. Results

#### 3.1. Participant characteristics

The mean age of the HC group was  $22.7 \pm 3.1$  years and the mean age of the AN group was  $26.4 \pm 6.5$  years. Age differed significantly between groups ( $t(39) = -2.30$ ,  $p = 0.03$ ). The HC group had a mean Body Mass Index (BMI) of  $21.5 \pm 1.9$  and the AN group had a mean BMI of  $15.7 \pm 2.1$ . BMI differed significantly between groups ( $t(39) = 9.19$ ,  $p < 0.0001$ ).

#### 3.2. Representations of Taste and Health in the OFC

##### 3.2.1. Neural Representations in the OFC Reflect Information About Taste and Health in Both Healthy Controls and Patients with Anorexia Nervosa

To test whether activity patterns in the OFC reflect high/low taste and health ratings, we trained classifiers to decode high/low taste ratings from brain activity during evaluation of the tastiness of foods and high/low health ratings from brain activity during evaluation of the healthiness of foods. In both groups, taste information could be decoded from the OFC (**Fig. 3a**, all  $p \leq 0.001$ ). We found no differences between groups ( $p = 0.21$ ) or subregions of the OFC ( $p = 0.76$ ). Similarly, health information could be decoded from the OFC in both HC and AN (**Fig. 3b**, all  $p \leq 0.002$ ), again with no differences between groups ( $p = 0.10$ ) or subregions ( $p = 0.33$ ). Permutation tests indicated that all classification scores were significantly above chance level, and the magnitude of scores was similar to the range of scores reported in a study that employed the same methods (Suzuki et al., 2017). Furthermore, a control analysis decoding objective visual information (luminance) from V1 resulted in mean cross-validation scores that fell in the same range (**Fig. 3c**).

These findings extend prior work showing that the OFC is involved in the evaluation of taste and health in healthy individuals (Hare et al., 2009, 2011; Londerée and Wagner, 2020) by demonstrating that taste and health ratings could be decoded from neural activity patterns. Additionally, these basic attributes of food could be decoded among individuals with AN, who make very different food decisions.

### **3.2.2. Neural Representations of Taste and Health are Differentially Distributed in Healthy Controls and Patients with Anorexia Nervosa**

The representation of taste and health throughout the brain in HC and AN was examined in exploratory whole-brain searchlight analyses. Searchlight maps can be viewed on NeuroVault (<https://neurovault.org/collections/MHPZTYJS/>). Taste information was decodable from more brain regions among HC compared to AN, and taste decoding in HC outperformed taste decoding in AN in several regions. The distribution of above-chance accuracy for health decoding across the brain did not differ significantly between groups. These analyses suggest that outside of the OFC, there are differences between groups in the decodability of taste information but not health information.

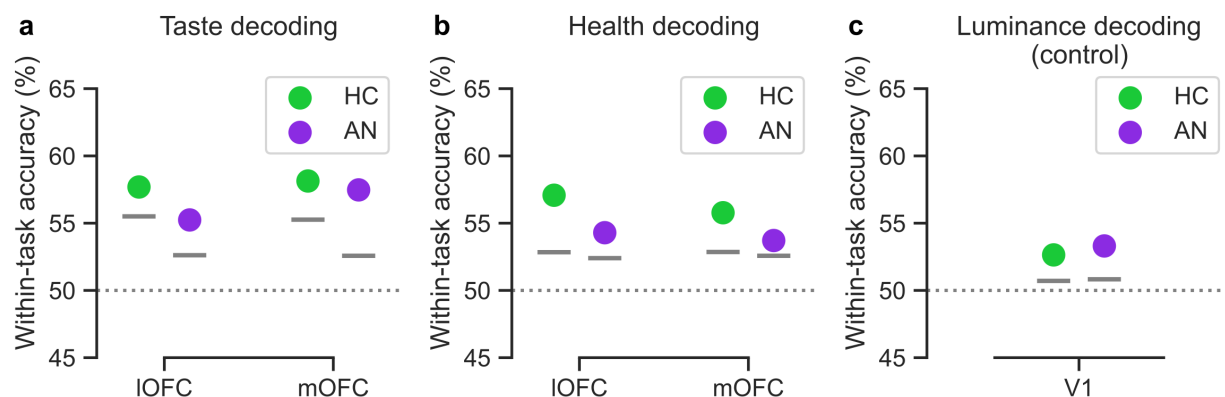

**Figure 3. The OFC represents information about taste and health.** (a) Mean within-task cross-validation accuracy for decoding of taste from the IOFC (left) and mOFC (right) for HC (in green) and AN (in purple). There were no differences between groups ( $p=0.21$ ) or subregions

( $p=0.76$ ). (b) Mean within-task cross-validation accuracy for decoding of health from the IOFC (left) and mOFC (right) for HC and AN. Within-task cross-validation accuracies did not differ between groups ( $p=0.10$ ) or subregions ( $p=0.33$ ). (c) Mean cross-validation accuracy for decoding of luminance in V1 from patterns of activity during taste and health ratings. Gray dashed lines indicate chance performance. Short gray horizontal lines denote the 95th percentiles of the null distributions obtained from permutation tests (all  $p \leq 0.002$ ).

### **3.3. Relationship Between Neural Representations of Taste/Health and Choice**

#### **Behavior**

#### **3.3.1. Neural Representations of Health Are a Better Indicator of Choice in**

#### **Patients with Anorexia Nervosa Than in Healthy Controls**

To test whether taste representations in the OFC are related to food choices, a classifier was trained on neural activity patterns from all taste trials and tested on patterns of neural activity during food choices (cross-task classification; **Fig. 2e**). Cross-task classification was conducted on the entire OFC given that there were no differences in within-task decoding performance for taste and health in the IOFC and mOFC (**Fig. 3a and 3b**). The cross-task taste classifier provided a continuous measure of evidence that the pattern of neural activity on a particular choice trial was consistent with the pattern elicited during the evaluation of a highly tasty food. To relate this evidence of taste neural representations to behavior, we used a mixed-effects logistic regression model to relate classifier evidence of taste to the likelihood that the chosen item was high in taste (1 = chosen high / 0 = chosen low). A similar procedure was undertaken for health by training a classifier on neural activity patterns from all health rating trials and testing those classifiers on patterns of neural activity during food choices. A mixed-effects logistic regression model was used to test the relationship between classifier evidence of health to the likelihood that the chosen item was high in health.

While the relationship between taste classifier evidence and choices of highly tasty items was not significant for HC and did not differ between groups (no main effects or interaction; **Fig. 4a**;

**Table 1**), there was an interaction between health classifier evidence and group on the selection of highly healthy foods (**Fig. 4b; Table 1**). In HC, health classifier evidence was not predictive of choices (no main effect of classifier evidence, **Table 1**) and the two groups did not differ in their choices of highly healthy foods when health classifier evidence equaled zero (no main effect of group; **Table 1**). Health classifier evidence was a stronger predictor of choices in AN than in HC, suggesting that neural representations of perceived health in the OFC are related to the prominent role of health in the deliberation of food choices among patients with AN.

| Fixed Effects               | Taste      |               |         | Health     |                  |         |
|-----------------------------|------------|---------------|---------|------------|------------------|---------|
|                             | Odds Ratio | 95% CI        | p-value | Odds Ratio | 95% CI           | p-value |
| Classifier evidence         | 2.04       | [0.52, 8.07]  | 0.307   | 4.00       | [0.31, 51.93]    | 0.290   |
| Group                       | 1.07       | [0.38, 2.99]  | 0.894   | 0.55       | [0.04, 8.08]     | 0.661   |
| Classifier evidence x group | 2.23       | [0.24, 20.43] | 0.478   | 299.22     | [1.38, 65019.33] | 0.038   |

**Table 1. The Effects of Classifier Evidence and Group on Food Choices.** The relationship between taste/health classifier evidence and choices. For the group variable, HC was coded as 0 and AN was coded as 1.

### 3.3.2. Control Analysis to Validate Cross-Task Classification

Participants viewed two items on each trial of the choice task and only one item on each trial of the rating tasks. Since the cross-task classifiers' output for each choice trial was a continuous measure of evidence of taste/health, there was ambiguity as to which item this evidence was reflective of. To assess the validity of the cross-task classification approach, we tested whether the level of classifier evidence on each trial was reflective of the label of the chosen food (**Fig. 2e**).

Cross-task accuracy for the taste of the chosen food was defined as the proportion of trials where the high/low level of taste classifier evidence matched the high/low taste label of the chosen food. Note that the chosen food could have been the reference food (i.e., the same item

always presented on the left) or the trial-unique food (i.e., the item on the right). Cross-task classification accuracy for the taste of the chosen food was significantly above chance for HC ( $t(20)=5.27$ ,  $p<0.0001$ ), but not AN ( $t(19)=0.53$ ,  $p=0.302$ ) (**Fig. 4c**). Similarly, cross-task accuracy for the healthiness of the chosen food was defined as the proportion of trials where the high/low level of health classifier evidence matched the high/low health label of the chosen food. Cross-task classification accuracy for the healthiness of the chosen food was significantly above chance for both HC ( $t(20)=2.56$ ,  $p=0.009$ ) and AN ( $t(19)=2.44$ ,  $p=0.012$ ) (**Fig. 4d**). We also tested the alternative possibility that taste/health classifier evidence from patterns of neural activity during choices reflected attributes of the trial-specific items more so than those of the chosen items. Cross-task classification of the taste and health of the chosen items outperformed cross-task classification of trial-specific items (main effect of chosen/trial-specific item on cross-task accuracy:  $\beta=6.01$ , 95% confidence interval (CI)=[1.22, 10.79],  $p=0.015$ ). Together, these findings provide validation for the assumption in our choice models that classifier evidence was reflective of attributes of the chosen food (**Fig. 4a and 4b**).

### ***3.3.3. Neural Representations of Health Are More Strongly Related to the Magnitude of Food Preferences in Patients with Anorexia Nervosa Than in Healthy Controls***

Above, we assessed choice behavior by binarizing the choice responses provided in the task. However, participants provided continuous responses in the behavioral choice task indicating how much they preferred to eat the reference item (i.e., item neutral in taste and health, the same on every trial, and presented on the left) or the trial-unique item (i.e., item on the right) (**Fig. 1c**). We therefore sought to examine the extent to which neural evidence of taste/health information in the OFC was related to the magnitude of food preferences by entering the continuous choice responses into mixed-effects linear regression models.

Greater taste classifier evidence in the OFC in HC was associated with a stronger preference for tasty trial-unique items (main effect of classifier evidence; **Fig. 4e; Table 2**), suggesting that neural evidence of taste information in the OFC at decision time is related to choice preferences in normative decision-making. The relationship between taste classifier evidence and choice preferences did not differ between groups (no interaction between classifier evidence and group; **Fig. 4e; Table 2**).

There was a stronger positive relationship between health classifier evidence in the OFC and choice preferences for AN compared to HC (significant interaction between classifier evidence and group; **Fig. 4f; Table 2**). Health classifier evidence in the OFC was not related to choice preferences in HC (no main effect of classifier evidence; **Fig. 4f; Table 2**). These findings provide additional support for the idea that the OFC plays an important role in the over-consideration of health information during maladaptive decision-making.

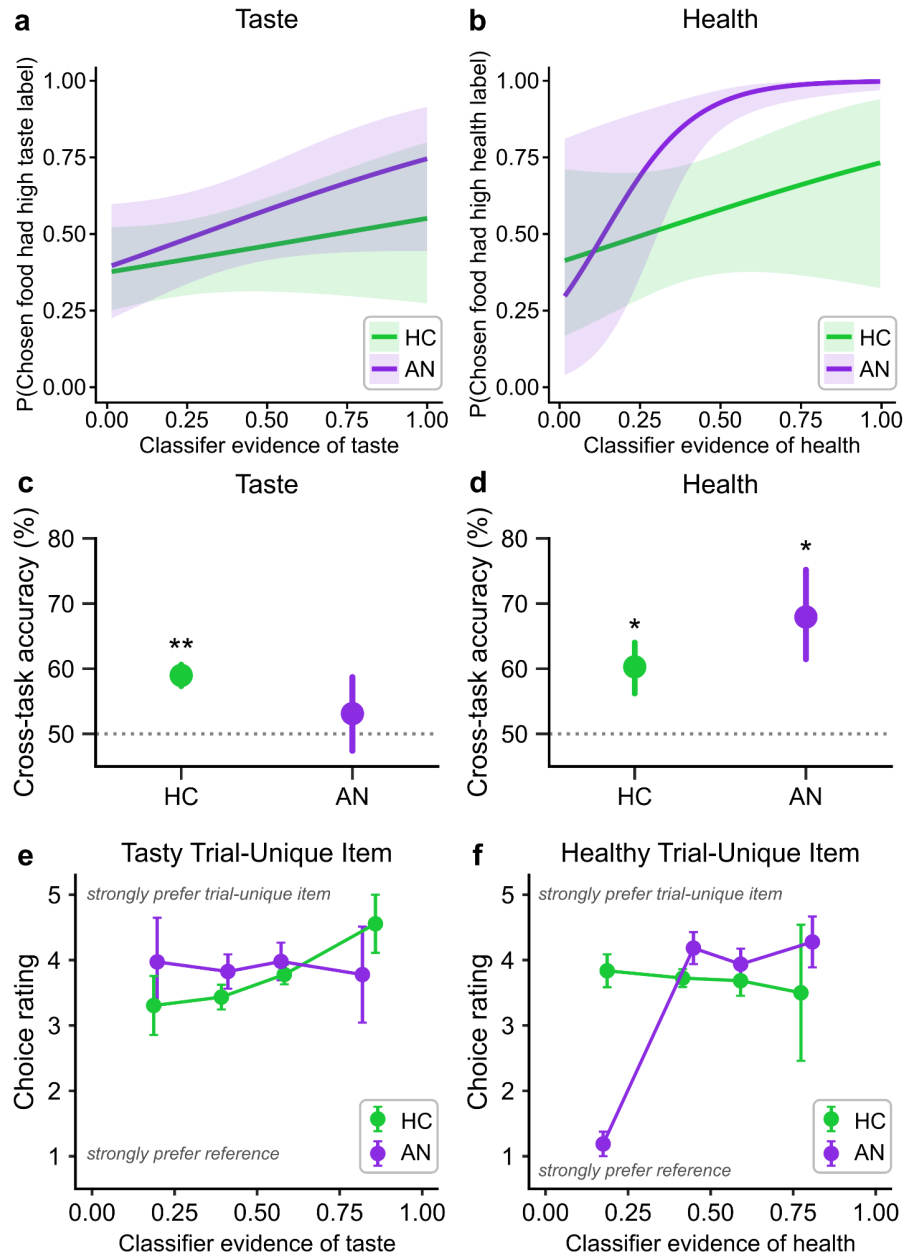

**Figure 4. Health classifier evidence in the OFC was related to choices in patients with anorexia nervosa.** (a) Taste classifier evidence in the OFC was not related to choices for highly tasty items in HC and the effect of taste classifier evidence was not stronger for AN compared to HC (**Table 1**). (b) Health classifier evidence in the OFC had a stronger influence on choices in AN than HC (**Table 1**). In (a) and (b), lines indicate group-level effects and shaded areas depict 95% confidence intervals. (c) Cross-task accuracy for the taste of the chosen item was significantly above chance for HC (in green;  $t(20)=5.27$ ,  $p<0.0001$ ) but not AN (in purple;  $t(19)=0.53$ ,  $p=0.302$ ). (d) Cross-task accuracy for the health of the chosen item was significantly above chance for HC and AN (HC:  $t(20)=2.56$ ,  $p=0.009$ ; AN:  $t(19)=2.44$ ,  $p=0.012$ ). In (c) and (d), error bars indicate standard error of the mean. \*\* $p<0.001$ , \* $p<0.05$ . (e) On trials with tasty trial-unique items, taste classifier evidence was related to HC participants' preference for the trial-unique option. The relationship between taste classifier evidence and choice preferences

did not differ between HC and AN (**Table 2**). (f) On trials with healthy trial-unique items, health classifier evidence and choice preferences were more strongly related for AN compared to HC (**Table 2**). Plots in (e) and (f) depict mean choice ratings across participants for binned classifier evidence (errors bars indicate standard error of the mean).

| Fixed Effects                                                 | Taste   |                |         | Fixed Effects                                                   | Health  |                |         |
|---------------------------------------------------------------|---------|----------------|---------|-----------------------------------------------------------------|---------|----------------|---------|
|                                                               | $\beta$ | 95% CI         | p-value |                                                                 | $\beta$ | 95% CI         | p-value |
| Classifier evidence                                           | 1.08    | [0.25, 1.90]   | 0.011   | Classifier evidence                                             | -0.41   | [-1.78, 0.95]  | 0.56    |
| Group                                                         | 0.02    | [-0.73, 0.78]  | 0.949   | Group                                                           | -1.02   | [-2.19, 0.14]  | 0.09    |
| Trial-unique item was not tasty                               | 0.32    | [-0.05, 0.70]  | 0.093   | Trial-unique item was not healthy                               | -0.21   | [-0.62, 0.20]  | 0.31    |
| Classifier evidence x group                                   | 0.24    | [-1.04, 1.52]  | 0.711   | Classifier evidence x group                                     | 2.51    | [0.29, 4.72]   | 0.03    |
| Classifier evidence x trial-unique item was not tasty         | -1.18   | [-2.00, -0.37] | 0.005   | Classifier evidence x trial-unique item was not healthy         | 0.07    | [-0.80, 0.93]  | 0.88    |
| Group x trial-unique item was not tasty                       | -0.86   | [-1.47, -0.26] | 0.005   | Group x trial-unique item was not healthy                       | 0.01    | [-0.77, 0.79]  | 0.98    |
| Classifier evidence x group x trial-unique item was not tasty | -1.49   | [-2.70, -0.27] | 0.016   | Classifier evidence x group x trial-unique item was not healthy | -3.33   | [-4.86, -1.81] | <0.0001 |

**Table 2. The Effects of Classifier Evidence and Group on the Magnitude of Food Preferences.** The relationship between taste/health classifier evidence and choice preferences. For the group variable, HC was coded as 0 and AN was coded as 1.

#### 4. Discussion

The current study examined representations of key food-related attributes—taste and health—in the OFC, and the role of these representations in food choice. Taste and health information were represented in the OFC not only among healthy individuals, but also among patients with AN. The latter routinely make very different and maladaptive food choices as compared with HC (Hadigan et al., 2000; Steinglass et al., 2015; Schebendach et al., 2019). Notably, information about health in the OFC was a better indicator of choices and the magnitude of preferences among individuals with AN than HC. These findings demonstrate that representations of health in the OFC are differentially related to normative and maladaptive decisions about food.



Previous univariate analyses of this dataset suggested that taste representations in the vmPFC influence choices in HC while health representations in the same region influence choices in AN (Foerde et al., 2015). We leveraged multivariate pattern analyses in the current study to further examine the strength of these relationships. In our analyses of the behavioral relevance of OFC representations of taste and health, we found that neural evidence of taste information was related to a stronger preference for tasty items in normative decision-making (**Fig. 4e**). This result complements behavioral findings indicating that subjective ratings of taste predict choices in HC (Foerde et al., 2015, 2018, 2020; Steinglass et al., 2016) by providing evidence for the involvement of the OFC in the consideration of taste information during choice deliberation. When we binarized the continuous choice preference responses, neural evidence of taste was not related to choice behavior (**Fig. 4a**) even though we accurately decoded the high/low taste of the chosen foods from neural activity during the choice phase in HC (**Fig. 4c**). This discrepancy could potentially be explained by the skewed distribution of taste ratings among healthy individuals. Since median splits were used to determine which foods should be labeled as highly tasty foods, what was labeled as a highly tasty choice option in the logistic regression model (y-axis label in **Fig. 4a**) was incongruent with some HC participants' taste ratings. Ten out of 21 HC participants had a high taste class that only included foods with a rating equal to the maximum rating of five (**Fig. 1a**). For these ten participants, when the trial-unique item was previously rated four on taste, the model labeled both the trial-unique and reference items as low-taste items, even though the trial-unique item was higher in taste than the reference item. This incongruity likely hindered our ability to detect the hypothesized relationship between neural evidence of taste in the OFC and binarized choices in HC. Future studies that employ food stimulus sets with more normally distributed taste ratings among participants may have more success in characterizing the contribution of OFC representations of taste to binary choices in normative decision-making (Lloyd et al., 2020). However, the association between

neural evidence of taste in the OFC and the more granular measure of choice preferences among HC provides support for the idea that the OFC plays an important role in the consideration of relevant attributes in normative decision-making.

There was a stronger brain-behavior relationship for health information in AN compared to HC. Neural evidence of health information in patterns of activity in the OFC was predictive of choices as well as choice preferences made by individuals with AN, suggesting that the OFC has a fundamental role in using health information to guide food choices among these patients. This complements behavioral findings that patients with AN—more so than healthy individuals—consider health more strongly in their food-related choices (Foerde et al., 2015, 2020; Steinglass et al., 2015, 2016; Uniacke et al., 2020). These findings point to an important role for the OFC in the over-consideration of health information during maladaptive decision-making in AN and complement previous work showing that the vmPFC is related to the ability to exert executive control and bias the influence of food-related attributes on choice in healthy individuals (Hare et al., 2009; Maier et al., 2015). Studying how health information is learned and encoded by patients with AN may provide additional insights into the neural mechanisms underlying maladaptive decision-making in this disorder. The contribution of hippocampal-based memory systems to the retrieval of knowledge about elemental attributes of foods during the deliberation of choices may be an interesting avenue of future research (Barron et al., 2013; Tang et al., 2014; Bakkour et al., 2019).

The present study was not specifically designed to undertake the analyses presented here and some limitations warrant consideration. The distribution of taste ratings among HC was skewed relative to AN (**Fig. 1a**), resulting in high/low taste food labels that did not capture the well-characterized influence of taste on choices among HC that was also previously observed in this sample (Foerde et al., 2015). This did not appear to alter the decoding results presented here,

but future studies that seek to employ classification methods could specifically select stimulus sets to address such concerns (Lloyd and Foerde, 2020; Lloyd et al., 2020; Schebendach et al., 2020). It should be noted that the magnitude of decoding accuracies should be interpreted with caution because these measures can be influenced by ROI size, degree of voxel smoothing, and the size of training and test data sets, among other factors (Haynes, 2015). As is the case in most decoding studies, the question of interest concerned the prevalence of specific information in certain ROIs. Non-parametric permutation tests, which provide more valid population-level inference than t-tests, revealed that taste and health were decoded from IOFC and mOFC significantly above chance (**Fig 3a and 3b**; Allefeld et al., 2016).

The results from the present study contribute to understanding the valuation process undertaken during food choices and provide insight into differences in the neural mechanisms that support how information about food is used during decision-making in healthy individuals and maladaptive decision-making in AN. These findings point to the importance and complexity of health information in food choice in AN. Recent advances in real-time fMRI neurofeedback technology or neuromodulation (e.g., rTMS) can perhaps be used in conjunction with multivariate analysis methods as promising avenues for understanding the mechanisms underlying the use of health and taste to guide food choices in individuals with AN (Thut and Pascual-Leone, 2010; Watanabe et al., 2017; Dalton et al., 2020). Ultimately, the aim of this work would be to downgrade the importance of health during food-related decisions among patients with AN. The current findings indicate that food decisions involve balancing different attributes of choice options (like health and taste), and that over-consideration of one attribute over others may cause disruptions in choice behavior and lead to persistent maladaptive behavior.

## References

- Abraham A, Pedregosa F, Eickenberg M, Gervais P, Mueller A, Kossaifi J, Gramfort A, Thirion B, Varoquaux G (2014) Machine learning for neuroimaging with scikit-learn. *Front Neuroinform* 8:14.
- Allefeld C, Gørgen K, Haynes J-D (2016) Valid population inference for information-based imaging: From the second-level t-test to prevalence inference. *Neuroimage* 141:378–392.
- American Psychiatric Association (2013) Diagnostic and statistical manual of mental disorders: DSM-5.
- Arcelus J, Mitchell AJ, Wales J, Nielsen S (2011) Mortality rates in patients with anorexia nervosa and other eating disorders. A meta-analysis of 36 studies. *Arch Gen Psychiatry* 68:724–731.
- Avants BB, Epstein CL, Grossman M, Gee JC (2008) Symmetric diffeomorphic image registration with cross-correlation: evaluating automated labeling of elderly and neurodegenerative brain. *Med Image Anal* 12:26–41.
- Bakkour A, Palombo DJ, Zylberberg A, Kang YH, Reid A, Verfaellie M, Shadlen MN, Shohamy D (2019) The hippocampus supports deliberation during value-based decisions. *Elife* 8 Available at: <http://dx.doi.org/10.7554/eLife.46080>.
- Ballesta S, Shi W, Conen KE, Padoa-Schioppa C (2020) Values encoded in orbitofrontal cortex are causally related to economic choices. *Nature* Available at: <http://dx.doi.org/10.1038/s41586-020-2880-x>.
- Barron HC, Dolan RJ, Behrens TEJ (2013) Online evaluation of novel choices by simultaneous representation of multiple memories. *Nat Neurosci* 16:1492.
- Bates D, Mächler M, Bolker B, Walker S (2015) Fitting Linear Mixed-Effects Models Using lme4. *Journal of Statistical Software* 67 Available at: <http://dx.doi.org/10.18637/jss.v067.i01>.
- Clithero JA, Rangel A (2014) Informatic parcellation of the network involved in the computation of subjective value. *Soc Cogn Affect Neurosci* 9:1289–1302.
- Dalton B, Foerde K, Bartholdy S, McClelland J, Kekic M, Grycuk L, Campbell IC, Schmidt U, Steinglass JE (2020) The effect of repetitive transcranial magnetic stimulation on food choice-related self-control in patients with severe, enduring anorexia nervosa. *Int J Eat Disord* 53:1326–1336.
- Esteban O et al. (2018a) FMRIPrep. Zenodo. Available at: <https://doi.org/10.5281/zenodo.852659>.
- Esteban O, Markiewicz CJ, Blair RW, Moodie CA, Isik AI, Erramuzpe A, Kent JD, Goncalves M, DuPre E, Snyder M, Oya H, Ghosh SS, Wright J, Durnez J, Poldrack RA, Gorgolewski KJ (2018b) fMRIPrep: a robust preprocessing pipeline for functional MRI. *Nature Methods* 16:111–116.
- Fairburn CG, Terence Wilson G (1993) Binge Eating: Nature, Assessment, and Treatment.

Guilford Publications.

- Foerde K, Gianini L, Wang Y, Wu P, Shohamy D, Walsh BT, Steinglass JE (2018) Assessment of test-retest reliability of a food choice task among healthy individuals. *Appetite* 123:352–356.
- Foerde K, Schebendach JE, Davis L, Daw N, Walsh BT, Shohamy D, Steinglass JE (2020) Restrictive eating across a spectrum from healthy to unhealthy: behavioral and neural mechanisms. *Psychol Med*:1–10.
- Foerde K, Steinglass JE, Shohamy D, Walsh BT (2015) Neural mechanisms supporting maladaptive food choices in anorexia nervosa. *Nat Neurosci* 18:1571–1573.
- Fonov VS, Evans AC, McKinstry RC, Almlri CR, Collins DL (2009) Unbiased nonlinear average age-appropriate brain templates from birth to adulthood. *Neuroimage Supplement* 1:S102.
- Frank GKW, Shott ME, Keffler C, Cornier M-A (2016) Extremes of eating are associated with reduced neural taste discrimination. *Int J Eat Disord* 49:603–612.
- Gorgolewski K, Burns CD, Madison C, Clark D, Halchenko YO, Waskom ML, Ghosh SS (2011) Nipype: a flexible, lightweight and extensible neuroimaging data processing framework in python. *Front Neuroinform* 5:13.
- Greve DN, Fischl B (2009) Accurate and robust brain image alignment using boundary-based registration. *Neuroimage* 48:63–72.
- Hadigan CM, Anderson EJ, Miller KK, Hubbard JL, Herzog DB, Klibanski A, Grinspoon SK (2000) Assessment of macronutrient and micronutrient intake in women with anorexia nervosa. *Int J Eat Disord* 28:284–292.
- Hanke M, Halchenko YO, Sederberg PB, Hanson SJ, Haxby JV, Pollmann S (2009) PyMVPA: A python toolbox for multivariate pattern analysis of fMRI data. *Neuroinformatics* 7:37–53.
- Hare TA, Camerer CF, Rangel A (2009) Self-control in decision-making involves modulation of the vmPFC valuation system. *Science* 324:646–648.
- Hare TA, Malmaud J, Rangel A (2011) Focusing attention on the health aspects of foods changes value signals in vmPFC and improves dietary choice. *J Neurosci* 31:11077–11087.
- Haynes J-D (2015) A Primer on Pattern-Based Approaches to fMRI: Principles, Pitfalls, and Perspectives. *Neuron* 87:257–270.
- Jenkinson M, Bannister P, Brady M, Smith S (2002) Improved optimization for the robust and accurate linear registration and motion correction of brain images. *Neuroimage* 17:825–841.
- Lanczos C (1964) Evaluation of Noisy Data. *Journal of the Society for Industrial and Applied Mathematics Series B Numerical Analysis* 1:76–85.
- Lloyd C, Foerde K (2020) Food Folio by the Columbia Center for Eating Disorders. Available at: [osf.io/483mx](https://osf.io/483mx).

- Lloyd EC, Shehzad Z, Schebendach J, Bakkour A, Xue AM, Assaf NF, Jilani R, Walsh BT, Steinglass J, Foerde K (2020) Food Folio by Columbia Center for Eating Disorders: A Freely Available Food Image Database. *Front Psychol* 11:585044.
- Londerée AM, Wagner DD (2020) The orbitofrontal cortex spontaneously encodes food health and contains more distinct representations for foods highest in tastiness. *Soc Cogn Affect Neurosci* Available at: <http://dx.doi.org/10.1093/scan/nsaa083>.
- Maier SU, Makwana AB, Hare TA (2015) Acute Stress Impairs Self-Control in Goal-Directed Choice by Altering Multiple Functional Connections within the Brain's Decision Circuits. *Neuron* 87:621–631.
- Norman KA, Polyn SM, Detre GJ, Haxby JV (2006) Beyond mind-reading: multi-voxel pattern analysis of fMRI data. *Trends Cogn Sci* 10:424–430.
- Padoa-Schioppa C, Assad JA (2006) Neurons in the orbitofrontal cortex encode economic value. *Nature* 441:223–226.
- Pedregosa F, Varoquaux G, Gramfort A, Michel V, Thirion B, Grisel O, Blondel M, Prettenhofer P, Weiss R, Dubourg V, Others (2011) Scikit-learn: Machine learning in Python. *the Journal of machine Learning research* 12:2825–2830.
- Plassmann H, O'Doherty J, Rangel A (2007) Orbitofrontal cortex encodes willingness to pay in everyday economic transactions. *J Neurosci* 27:9984–9988.
- Power JD, Mitra A, Laumann TO, Snyder AZ, Schlaggar BL, Petersen SE (2014) Methods to detect, characterize, and remove motion artifact in resting state fMRI. *Neuroimage* 84:320–341.
- Rolls ET, Joliot M, Tzourio-Mazoyer N (2015) Implementation of a new parcellation of the orbitofrontal cortex in the automated anatomical labeling atlas. *Neuroimage* 122:1–5.
- Schebendach JE, Uniacke B, Walsh BT, Mayer LES, Attia E, Steinglass J (2019) Fat preference and fat intake in individuals with and without anorexia nervosa. *Appetite* 139:35–41.
- Schebendach J, Mayer L, Foerde KE, Gianini L, Walsh BT, Steinglass J (2020) Food Folio by the Columbia Center for Eating Disorders. Available at: <https://doi.org/10.7916/d8-497c-2724>.
- Spitzer RL, Williams JBW, Gibbon M (1987) Structured clinical interview for DSM-IV (SCID).
- Steinglass J, Foerde K, Kostro K, Shohamy D, Walsh BT (2015) Restrictive food intake as a choice—a paradigm for study. *Int J Eat Disord* 48:59–66.
- Steinglass J, Foerde K, Shohamy D, Walsh BT (2016) Restrictive food choice shows neurological signature of habit. *Appetite* Available at: <https://doi.org/10.1016/j.appet.2015.08.032>.
- Suzuki S, Cross L, O'Doherty JP (2017) Elucidating the underlying components of food valuation in the human orbitofrontal cortex. *Nat Neurosci* 20:1780–1786.
- Tang DW, Fellows LK, Dagher A (2014) Behavioral and neural valuation of foods is driven by implicit knowledge of caloric content. *Psychol Sci* 25:2168–2176.

- Thut G, Pascual-Leone A (2010) A review of combined TMS-EEG studies to characterize lasting effects of repetitive TMS and assess their usefulness in cognitive and clinical neuroscience. *Brain Topogr* 22:219–232.
- Tustison NJ, Avants BB, Cook PA, Zheng Y, Egan A, Yushkevich PA, Gee JC (2010) N4ITK: improved N3 bias correction. *IEEE Trans Med Imaging* 29:1310–1320.
- Tzourio-Mazoyer N, Landeau B, Papathanassiou D, Crivello F, Etard O, Delcroix N, Mazoyer B, Joliot M (2002) Automated anatomical labeling of activations in SPM using a macroscopic anatomical parcellation of the MNI MRI single-subject brain. *Neuroimage* 15:273–289.
- Uniacke B, Slattery R, Walsh BT, Shohamy D, Foerde K, Steinglass J (2020) A comparison of food-based decision-making between restricting and binge-eating/purging subtypes of anorexia nervosa. *Int J Eat Disord* Available at: <http://dx.doi.org/10.1002/eat.23359>.
- Walsh BT (2011) The importance of eating behavior in eating disorders. *Physiol Behav* 104:525–529.
- Watanabe T, Sasaki Y, Shibata K, Kawato M (2017) Advances in fMRI Real-Time Neurofeedback. *Trends Cogn Sci* 21:997–1010.
- Winkler AM, Ridgway GR, Webster MA, Smith SM, Nichols TE (2014) Permutation inference for the general linear model. *Neuroimage* 92:381–397.
- Woolrich MW, Ripley BD, Brady M, Smith SM (2001) Temporal autocorrelation in univariate linear modeling of FMRI data. *Neuroimage* 14:1370–1386.
